# Supplementary material for: Influence of Curved Video Laryngoscope Blade Sizes and Patient Heights on Video Laryngoscopic Views: A Randomized Controlled Trial
Source: MDPI journal article supplement (doi:10.3390/jpm14020209), 2024-02-15
Supplement: s1 [file s1]

**Supplementary table S1.** Technical specification of using Acemedical Acescope

Disposable laryngoscope blades are coated with an anti-fog coating and employ the familiar Macintosh blade technique.

|                         |                                                             |
|-------------------------|-------------------------------------------------------------|
| Storage type            | Video (MJPEG), Photo (JPG)                                  |
| Display                 | 2.8", 240(width) X 320 (height)/TFT-LCD                     |
| Alarm                   | Flashing Pink LED before auto shut down.                    |
| Power                   | Lithium-ion battery (3.6Vdc/1900mAh)                        |
| Operating/Charging Time | Over 240 min./over 180 min.                                 |
| Wireless Charger        | :Input 100-240V~, 50/60Hz, 1A                               |
| Classification          | Class II/Type BF applied part: AceBlade /Internally Powered |
| Applied part            | AceBlade                                                    |
